# Supplementary material for: Diarrhea no more: does zinc help the poor? Evidence on the effectiveness of programmatic efforts to reach poorest in delivering zinc and ORS at scale in UP and Gujarat, India
Source: J Glob Health. 2016 Dec 14;6(2):021001. doi: 10.7189/jogh.06.021001 (PMC5234496; doi:10.7189/jogh.06.021001)
Supplement: Online Supplementary Document [file jogh-06-021001-s001.pdf]

## Online Supplementary Document

LeFevre et al. Diarrhea no more: does zinc help the poor? Evidence on the effectiveness of programmatic efforts to reach poorest in delivering zinc and ORS at scale in UP and Gujarat, India  
J Glob Health 2016;6:021001

Figure S1. Treatment for diarrhea in children under 5 by socioeconomic status and state

Gujarat

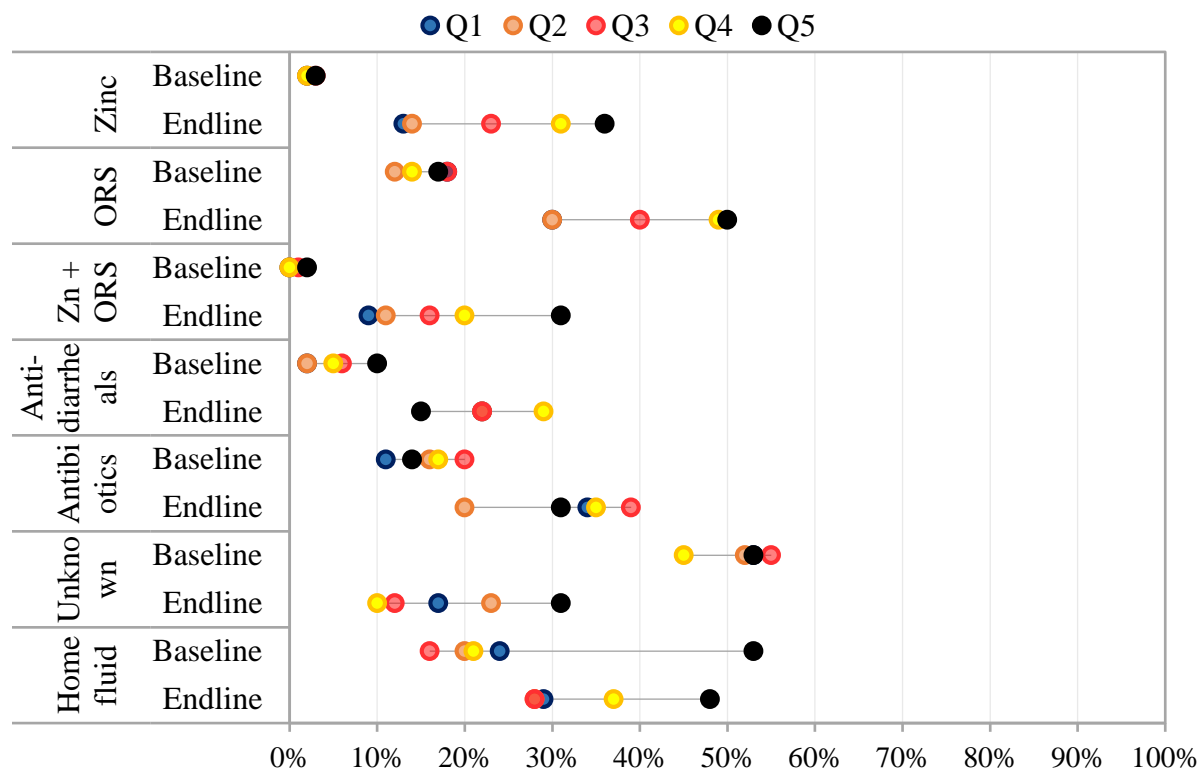

Uttar Pradesh Treatment for diarrhea in children under 5 by socioeconomic status and state

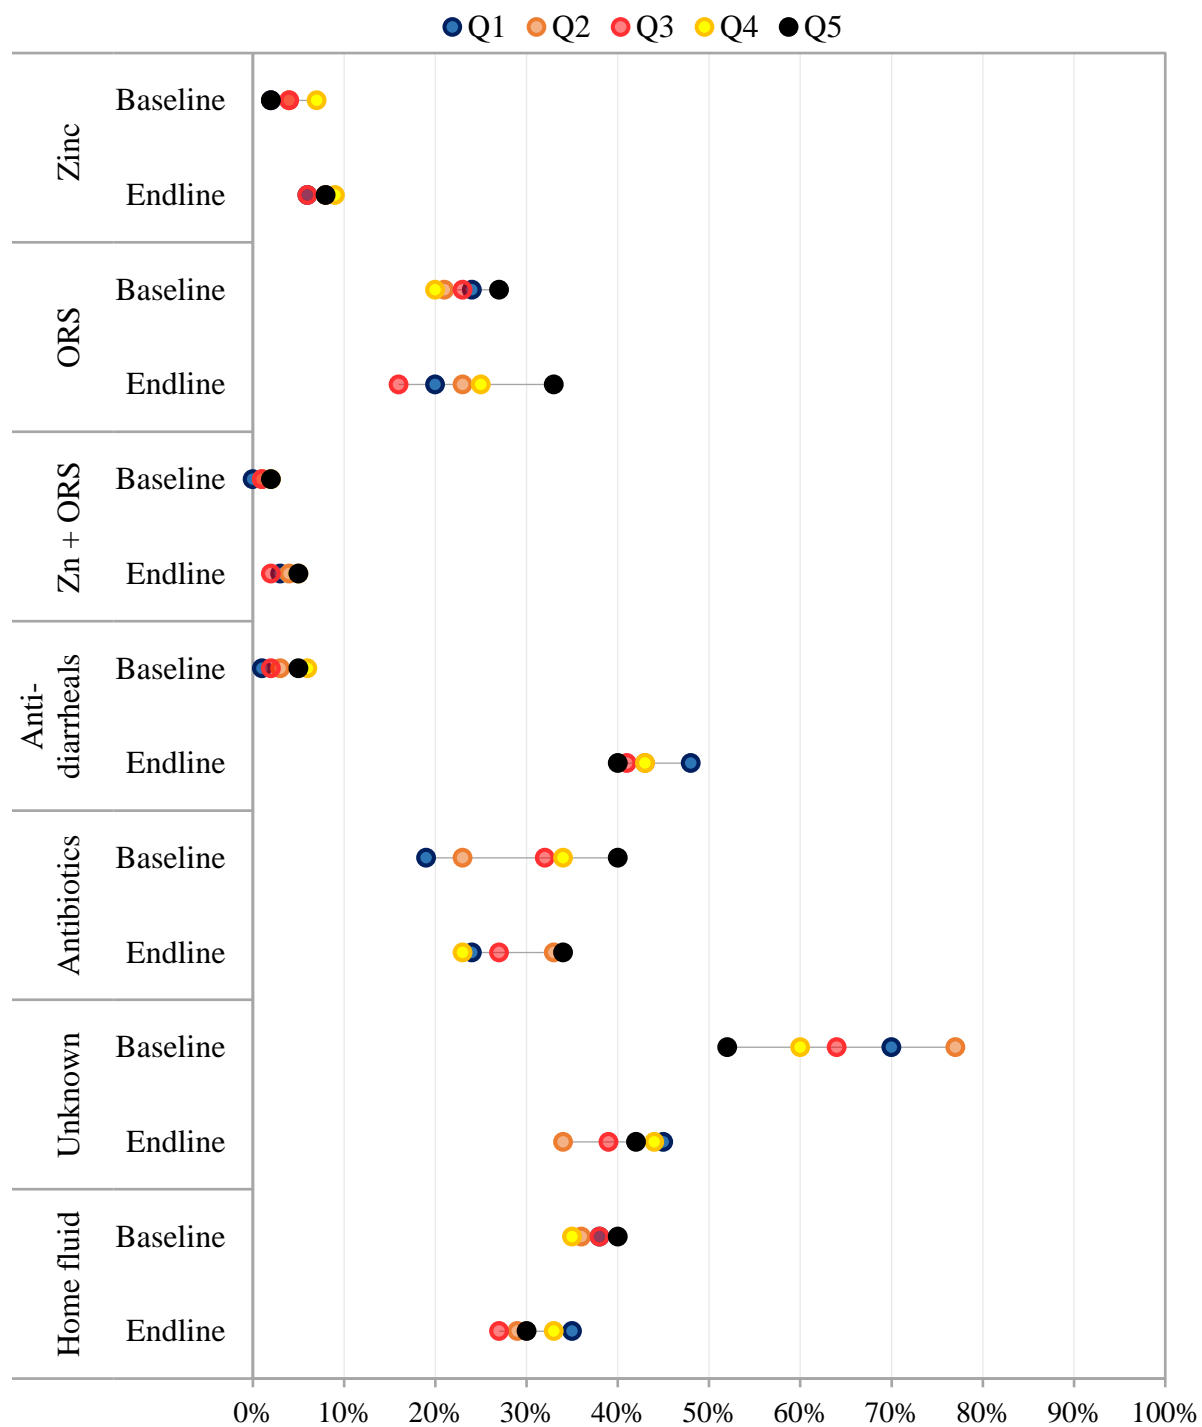

**Table S1.** Awareness of zinc and ORS for the treatment of diarrhea in Gujarat and UP

|                                    | Gujarat ***      |                  |                             | Uttar Pradesh**** |                  |                             |
|------------------------------------|------------------|------------------|-----------------------------|-------------------|------------------|-----------------------------|
|                                    | Baseline         | Endline          | Endline-Baseline Difference | Baseline          | Endline          | Endline-Baseline Difference |
|                                    | n=4,200          | n=5,080          |                             | n=3,889           | n= 7,853         |                             |
| <b>Heard of zinc for diarrhea*</b> |                  |                  |                             |                   |                  |                             |
| <b>Socioeconomic status</b>        |                  |                  |                             |                   |                  |                             |
| Q1                                 | 5%               | 15%              | 10% (6%-13%)*               | 6%                | 25%              | 20% (16%-23%)*              |
| Q2                                 | 4%               | 22%              | 18% (14%-22%)*              | 7%                | 30%              | 22% (18%-27%)*              |
| Q3                                 | 5%               | 22%              | 17% (14%-21%)*              | 6%                | 30%              | 24% (20%-28%)*              |
| Q4                                 | 4%               | 25%              | 21% (16%-25%)*              | 6%                | 34%              | 27% (23%-31%)*              |
| Q5                                 | 6%               | 31%              | 24% (19%-30%)*              | 6%                | 42%              | 36% (32%-41%)*              |
| Concentration index (95% CI)       | 0.21 (0.10-0.32) | 0.14 (0.09-0.19) |                             | 0.01 (-0.07-0.10) | 0.02 (0.00-0.04) |                             |
| <b>Gender</b>                      |                  |                  |                             |                   |                  |                             |
| Male                               | 5%               | 23%              | 18% (15%-21%)*              | 7%                | 31%              | 24% (21%-27%)*              |
| Female                             | 4%               | 22%              | 18% (15%-21%)*              | 5%                | 33%              | 28% (25%-32%)*              |
| <b>Ethnicity</b>                   |                  |                  |                             |                   |                  |                             |
| Scheduled caste                    | 4%               | 25%              | 21% (15%-26%)*              | 7%                | 31%              | 25% (21%-28%)*              |
| Scheduled tribe                    | 5%               | 19%              | 14% (10%-18%)*              |                   |                  |                             |
| Other backward caste               | 6%               | 25%              | 19% (15%-22%)*              | 7%                | 32%              | 25% (21%-28%)*              |
| Other                              | 3%               | 23%              | 20% (15%-26%)*              | 5%                | 35%              | 31% (26%-35%)*              |
| <b>Maternal education</b>          |                  |                  |                             |                   |                  |                             |
| Mothers with <1 year of schooling  | 5%               | 17%              | 13% (10%-16%)*              | 7%                | 29%              | 22% (20%-25%)*              |
| Mothers with ≥1 year of schooling  | 5%               | 27%              | 22% (19%-26%)*              | 5%                | 35%              | 30% (27%-33%)*              |
| <b>Heard of ORS for diarrhea</b>   |                  |                  |                             |                   |                  |                             |
| <b>Socioeconomic status</b>        |                  |                  |                             |                   |                  |                             |
| Q1                                 | 53%              | 56%              | 3% (-5%-12%)*               | 96%               | 94%              | -2% (-5%-1%)*               |
| Q2                                 | 51%              | 62%              | 11% (5%-18%)*               | 97%               | 95%              | -2% (-4%--1%)*              |
| Q3                                 | 53%              | 65%              | 12% (6%-19%)*               | 96%               | 93%              | -3% (-5%- -0%)*             |
| Q4                                 | 56%              | 71%              | 15% (9%-21%)*               | 97%               | 94%              | -3% (-5%- -1%)*             |
| Q5                                 | 65%              | 70%              | 6% (-1%-12%)*               | 96%               | 96%              | -0% (-2%-1%)*               |

|                                 |                  |                  |               |                      |                    |                 |
|---------------------------------|------------------|------------------|---------------|----------------------|--------------------|-----------------|
| Concentration index (95% CI)    | 0.06 (0.03-0.08) | 0.06 (0.04-0.08) |               | -0.00 (-0.01- -0.00) | -0.00 (-0.01-0.00) |                 |
| <b>Gender</b>                   |                  |                  |               |                      |                    |                 |
| Male                            | 56%              | 66%              | 10% (5%-15%)* | 96%                  | 94%                | -2% (-4%- -0%)* |
| Female                          | 55%              | 64%              | 9% (5%-14%)*  | 97%                  | 95%                | -2% (-4%- -0%)* |
| <b>Ethnicity</b>                |                  |                  |               |                      |                    |                 |
| Scheduled caste                 | 60%              | 75%              | 15% (8%-22%)* | 98%                  | 94%                | -3% (-5%- -1%)* |
| Scheduled tribe                 | 55%              | 61%              | 6% (-2%-13%)* |                      |                    |                 |
| Other backward caste            | 55%              | 64%              | 8% (2%-15%)*  | 95%                  | 94%                | -1% (-3%-1%)*   |
| Other                           | 51%              | 65%              | 15% (7%-23%)* | 98%                  | 96%                | -1% (-3%-1%)*   |
| <b>Maternal education</b>       |                  |                  |               |                      |                    |                 |
| Mothers with <1 yr of schooling | 49%              | 59%              | 8% (1%-15%)*  | 95%                  | 94%                | -2% (-3%-0%)*   |
| Mothers with ≥1 yr of schooling | 61%              | 69%              | 9% (5%-14%)*  | 98%                  | 95%                | -2% (-4%- -1%)* |

**Table S2. Sources of careseeking for children 2-59 months with diarrhea in the preceding 2 weeks**

|                                   | Gujarat***         |                    |                             | Uttar Pradesh****  |                    |                             |
|-----------------------------------|--------------------|--------------------|-----------------------------|--------------------|--------------------|-----------------------------|
|                                   | Baseline           | Endline            | Endline-Baseline Difference | Baseline           | Endline            | Endline-Baseline Difference |
| <b>Treatment outside the home</b> | <b>n=594</b>       | <b>n=553</b>       |                             | <b>n=652</b>       | <b>n=1,001</b>     |                             |
| <b>Socioeconomic status</b>       |                    |                    |                             |                    |                    |                             |
| Q1                                | 65%                | 75%                | 10% (-3%-22%)               | 89%                | 83%                | -6% (-14%-2%)               |
| Q2                                | 61%                | 73%                | 12% (0%-24%)                | 91%                | 89%                | -2% (-10%-6%)               |
| Q3                                | 72%                | 76%                | 4% (-7%-16%)                | 85%                | 78%                | -7% (-17%-2%)               |
| Q4                                | 68%                | 73%                | 6% (-8%-19%)                | 89%                | 85%                | -5% (-15%-6%)               |
| Q5                                | 71%                | 73%                | 2% (-11%-16%)               | 87%                | 90%                | 3% (-7%-14%)                |
| Concentration index (95% CI)      | 0.02 (-0.01-0.05)  | -0.03 (-0.06-0.00) |                             | -0.01 (-0.02-0.01) | 0.01 (0.00- 0.02)  |                             |
| <b>Gender</b>                     |                    |                    |                             |                    |                    |                             |
| Male                              | 67%                | 76%                | 8% (1%-16%)*                | 89%                | 85%                | -4% (-9%-1%)                |
| Female                            | 67%                | 73%                | 6% (-2%-14%)                | 87%                | 84%                | -4% (-10%-3%)               |
| <b>Ethnicity</b>                  |                    |                    |                             |                    |                    |                             |
| Scheduled caste                   | 77%                | 77%                | -0% (-12%-12%)              | 89%                | 84%                | -5% (-12%-2%)               |
| Scheduled tribe                   | 67%                | 73%                | 6% (-5%-17%)                | -                  | -                  | -                           |
| Other backward caste              | 63%                | 74%                | 12% (3%-21%)*               | 87%                | 86%                | -1% (-7%-5%)                |
| Other                             | 71%                | 74%                | 3% (-12%-19%)               | 88%                | 78%                | -10% (-20%- -1%)*           |
| <b>Maternal education</b>         |                    |                    |                             |                    |                    |                             |
| Mothers with <1 yr of schooling   | 68%                | 73%                | 5% (-3%-13%)                | 89%                | 84%                | -5% (-10%-1%)               |
| Mothers with ≥1 yr of schooling   | 66%                | 75%                | 9% (1%-17%)*                | 87%                | 85%                | -3% (-9%-4%)                |
| <b>Private sector careseeking</b> | <b>n=398</b>       | <b>n=412</b>       |                             | <b>n=572</b>       | <b>n=854</b>       |                             |
| <b>Socioeconomic status</b>       |                    |                    |                             |                    |                    |                             |
| Q1                                | 86%                | 81%                | -5% (-18%-9%)               | 99%                | 88%                | -11% (-18%- -5%)*           |
| Q2                                | 87%                | 67%                | -20% (-33%- -6%)*           | 98%                | 84%                | -14% (-21%- -6%)*           |
| Q3                                | 83%                | 75%                | -8% (-20% -4%)              | 99%                | 88%                | -11% (-17%- -4%)*           |
| Q4                                | 87%                | 70%                | -16% (-30%- -3%)*           | 97%                | 88%                | -10% (-18%- -2%)*           |
| Q5                                | 88%                | 81%                | -7% (-22%-8%)               | 94%                | 91%                | -3% (-11%-5%)               |
| Concentration index (95% CI)      | -0.00 (-0.02-0.02) | 0.01 (-0.03-0.05)  |                             | -0.00 (-0.01-0.00) | -0.00 (-0.01-0.02) |                             |
| <b>Gender</b>                     |                    |                    |                             |                    |                    |                             |
| Male                              | 89%                | 76%                | -13% (-21%- -6%)*           | 98%                | 89%                | -10% (-14%- -5%)*           |
| Female                            | 82%                | 74%                | -9% (-19%-2%)               | 97%                | 86%                | -11% (-16%- -6%)*           |

|                                  |                                       |              |                 |                                    |              |                 |
|----------------------------------|---------------------------------------|--------------|-----------------|------------------------------------|--------------|-----------------|
| <b>Ethnicity</b>                 |                                       |              |                 |                                    |              |                 |
| Scheduled caste                  | 90%                                   | 76%          | -14% (-27%-0%)* | 98%                                | 86%          | -12% (-18%-6%)* |
| Scheduled tribe                  | 88%                                   | 78%          | -10% (-21%-1%)  |                                    |              |                 |
| Other backward caste             | 85%                                   | 70%          | -15% (-26%-4%)* | 98%                                | 88%          | -10% (-15%-5%)* |
| Other                            | 81%                                   | 83%          | 3% (-13%-18%)   | 96%                                | 90%          | -6% (-14%-2%)   |
| <b>Maternal education</b>        |                                       |              |                 |                                    |              |                 |
| Mothers with <1 yr of schooling  | 88%                                   | 77%          | -10% (-19%--2%) | 98%                                | 86%          | -12% (-17%-8%)* |
| Mothers with ≥1 yr of schooling  | 84%                                   | 73%          | -12% (-21%-3%)  | 97%                                | 89%          | -7% (-12%-3%)*  |
| <b>Public sector careseeking</b> | <b>n=398</b>                          | <b>n=412</b> |                 | <b>n=572</b>                       | <b>n=854</b> |                 |
| <b>Socioeconomic status</b>      |                                       |              |                 |                                    |              |                 |
| Q1                               | 20%                                   | 27%          | 8% (-8%-23%)    | 3%                                 | 8%           | 5% (-1%-11%)**  |
| Q2                               | 21%                                   | 32%          | 10% (-4%-25%)   | 4%                                 | 7%           | 4% (-2%-10%)    |
| Q3                               | 18%                                   | 44%          | 25% (12%-39%)*  | 2%                                 | 7%           | 5% (-1%-11%)    |
| Q4                               | 24%                                   | 44%          | 20% (4%-35%)*   | 4%                                 | 10%          | 6% (-2%-13%)    |
| Q5                               | 16%                                   | 40%          | 24% (8%-41%)*   | 7%                                 | 8%           | 1% (-10%-11%)   |
| Concentration index (95% CI)     | 0.03 (-0.10- 0.15) 0.04 (-0.05- 0.13) |              |                 | 0.13 (-0.05-0.31) 0.15 (0.02-0.27) |              |                 |
| <b>Gender</b>                    |                                       |              |                 |                                    |              |                 |
| Male                             | 17%                                   | 36%          | 19% (9%-28%)*   | 4%                                 | 9%           | 5% (0%-9%)*     |
| Female                           | 23%                                   | 39%          | 16% (5%-27%)*   | 4%                                 | 7%           | 3% (-2%-8%)     |
| <b>Ethnicity</b>                 |                                       |              |                 |                                    |              |                 |
| Scheduled caste                  | 14%                                   | 37%          | 23% (9%-38%)*   | 3%                                 | 10%          | 8% (3%-13%)*    |
| Scheduled tribe                  | 20%                                   | 31%          | 11% (-2%-24%)   |                                    |              |                 |
| Other backward caste             | 19%                                   | 42%          | 23% (11%-34%)*  | 4%                                 | 6%           | 2% (-3%-6%)     |
| Other                            | 29%                                   | 37%          | 8% (-12%-29%)   | 6%                                 | 9%           | 3% (-5%-12%)    |
| <b>Maternal education</b>        |                                       |              |                 |                                    |              |                 |
| Mothers with <1 yr of schooling  | 19%                                   | 37%          | 18% (8%-28%)*   | 4%                                 | 8%           | 4% (-0%-8%)**   |
| Mothers with ≥1 yr of schooling  | 21%                                   | 38%          | 17% (7%-27%)*   | 4%                                 | 8%           | 4% (-0%-9%)**   |

\*p<0.05; \*\*p=0.10;

\*\*\*Adjusted for type of family, maternal education, number of children, below poverty, and ethnicity;

\*\*\*\*Adjusted for type of family, maternal education, number of children, gender, age in mothers, breastfeeding status, below poverty, and ethnicity

**Table S3.** Treatment received among children 2-59 months with diarrhea in the preceding 2 weeks

| Number of diarrhea cases in the preceding 2 weeks | Gujarat           |                   |                                | Uttar Pradesh      |                    |                                |
|---------------------------------------------------|-------------------|-------------------|--------------------------------|--------------------|--------------------|--------------------------------|
|                                                   | Baseline<br>n=594 | Endline<br>n=553  | Endline-Baseline<br>Difference | Baseline<br>n=652  | Endline<br>n=1,001 | Endline-Baseline<br>Difference |
| <b>Zinc</b>                                       |                   |                   |                                |                    |                    |                                |
| <b>Socioeconomic status</b>                       |                   |                   |                                |                    |                    |                                |
| Q1                                                | 2%                | 13%               | 11% (1%-20%)*                  | 2%                 | 6%                 | 4% (-0%-8%)**                  |
| Q2                                                | 2%                | 14%               | 12% (5%-19%)*                  | 4%                 | 8%                 | 4% (-2%-10%)                   |
| Q3                                                | 3%                | 23%               | 20% (11%-28%)*                 | 4%                 | 6%                 | 2% (-4%-8%)                    |
| Q4                                                | 2%                | 31%               | 29% (19%-39%)*                 | 7%                 | 9%                 | 2% (-5%-9%)                    |
| Q5                                                | 3%                | 36%               | 33% (22%-44%)*                 | 2%                 | 8%                 | 7% (-0%-14%)**                 |
| Concentration index (95% CI)                      | 0.12 (-0.16-0.41) | 0.16 (0.05- 0.28) |                                | -0.01 (-0.22-0.21) | 0.09 (-0.04-0.21)  |                                |
| <b>Gender</b>                                     |                   |                   |                                |                    |                    |                                |
| Male                                              | 3%                | 23%               | 20% (14%-26%)*                 | 4%                 | 8%                 | 4% (0%-8%)*                    |
| Female                                            | 1%                | 22%               | 21% (15%-26%)*                 | 3%                 | 6%                 | 3% (-1%-6%)                    |
| <b>Ethnicity</b>                                  |                   |                   |                                |                    |                    |                                |
| Scheduled caste                                   | 0%                | 22%               | 22% (13%-32%)*                 | 4%                 | 5%                 | 1% (-3%-5%)                    |
| Scheduled tribe                                   | 3%                | 16%               | 13% (6%-20%)*                  | -                  | -                  | -                              |
| Other backward caste                              | 3%                | 26%               | 23% (16%-31%)*                 | 4%                 | 8%                 | 4% (-0%-9%)**                  |
| Other                                             | 1%                | 28%               | 28% (14%-42%)*                 | 3%                 | 8%                 | 5% (-1%-11%)**                 |
| <b>Maternal education</b>                         |                   |                   |                                |                    |                    |                                |
| Mothers with <1 yr of schooling                   | 5%                | 23%               | 18% (12%-24%)*                 | 3%                 | 7%                 | 4% (1%-7%)*                    |
| Mothers with ≥1 yr of schooling                   | 0%                | 22%               | 22% (17%-28%)*                 | 5%                 | 8%                 | 2% (-3%-8%)                    |
| <b>ORS</b>                                        |                   |                   |                                |                    |                    |                                |
| <b>Socioeconomic status</b>                       |                   |                   |                                |                    |                    |                                |
| Q1                                                | 18%               | 30%               | 12% (0%-24%)*                  | 24%                | 20%                | -5% (-16%-7%)                  |
| Q2                                                | 12%               | 30%               | 17% (6%-29%)*                  | 21%                | 23%                | 2% (-8%-11%)                   |
| Q3                                                | 18%               | 40%               | 21% (9%-34%)*                  | 23%                | 16%                | -8% (-18%-1%)                  |
| Q4                                                | 14%               | 49%               | 35% (23%-47%)*                 | 20%                | 25%                | 5% (-8%-17%)                   |
| Q5                                                | 17%               | 50%               | 33% (20%-46%)*                 | 27%                | 33%                | 6% (-8%-21%)                   |
| Concentration index (95% CI)                      | 0.05 (-0.04-0.15) | 0.04 (-0.03-0.11) |                                | -0.01 (-0.09-0.07) | 0.01 (-0.06-0.08)  |                                |
| <b>Gender</b>                                     |                   |                   |                                |                    |                    |                                |
| Male                                              | 14%               | 39%               | 25% (17%-33%)*                 | 21%                | 24%                | 3% (-4%-10%)                   |
| Female                                            | 17%               | 39%               | 22% (13%-30%)*                 | 25%                | 20%                | -5% (-12%-2%)                  |
| <b>Ethnicity</b>                                  |                   |                   |                                |                    |                    |                                |

|                                 |                  |                    |                |                    |                    |                |
|---------------------------------|------------------|--------------------|----------------|--------------------|--------------------|----------------|
| Scheduled caste                 | 17%              | 46%                | 30% (16%-43%)* | 22%                | 23%                | 1% (-9%-10%)   |
| Scheduled tribe                 | 16%              | 31%                | 15% (4%-27%)*  | -                  | -                  | -              |
| Other backward caste            | 15%              | 41%                | 26% (17%-34%)* | 24%                | 19%                | -4% (-12%-4%)  |
| Other                           | 15%              | 43%                | 28% (13%-44%)* | 21%                | 28%                | 7% (-4%-17%)   |
| <b>Maternal education</b>       |                  |                    |                |                    |                    |                |
| Mothers with <1 yr of schooling | 14%              | 36%                | 23% (14%-31%)* | 21%                | 17%                | -3% (-11%-4%)  |
| Mothers with ≥1 yr of schooling | 18%              | 41%                | 24% (16%-31%)* | 25%                | 27%                | 2% (-6%-10%)   |
| <b>Zinc and ORS</b>             |                  |                    |                |                    |                    |                |
| <b>Socioeconomic status</b>     |                  |                    |                |                    |                    |                |
| Q1                              | 0%               | 9%                 | 9% (0%-17%)*   | 0%                 | 3%                 | 2% (0%-5%)     |
| Q2                              | 0%               | 11%                | 11% (5%-17%)*  | 1%                 | 4%                 | 3% (-1%-7%)    |
| Q3                              | 1%               | 16%                | 16% (8%-23%)*  | 1%                 | 2%                 | 0% (-2%-3%)    |
| Q4                              | 0%               | 20%                | 29% (19%-38%)* | 2%                 | 5%                 | 4% (-1%-8%)*   |
| Q5                              | 2%               | 31%                | 30% (19%-40%)* | 2%                 | 5%                 | 3% (-3%-10%)   |
| Concentration index (95% CI)    | 0.59 (0.06-1.12) | 0.29 (0.05-0.31)   |                | 0.13 (-0.17-0.42)  | 0.04 (-0.15-0.23)  |                |
| <b>Gender</b>                   |                  |                    |                |                    |                    |                |
| Male                            | 0%               | 19%                | 19% (14%-25%)* | 2%                 | 5%                 | 3% (-0%-5%)**  |
| Female                          | 1%               | 18%                | 17% (12%-22%)* | 0%                 | 2%                 | 2% (-0%-4%)**  |
| <b>Ethnicity</b>                |                  |                    |                |                    |                    |                |
| Scheduled caste                 | -2%              | 16%                | 18% (9%-26%)*  | 1%                 | 2%                 | 1% (-1%-4%)    |
| Scheduled tribe                 | 2%               | 14%                | 12% (5%-19%)*  | -                  | -                  | -              |
| Other backward caste            | 0%               | 21%                | 21% (15%-28%)* | 1%                 | 4%                 | 3% (-1%-6%)    |
| Other                           | -1%              | 25%                | 25% (13%-38%)* | 2%                 | 5%                 | 3% (-3%-8%)    |
| <b>Maternal education</b>       |                  |                    |                |                    |                    |                |
| Mothers with <1 yr of schooling | 2%               | 18%                | 16% (10%-22%)* | 1%                 | 4%                 | 3% (1%-5%)*    |
| Mothers with ≥1 yr of schooling | -1%              | 19%                | 20% (15%-25%)* | 2%                 | 3%                 | 2% (-1%-5%)    |
| <b>Antidiarrheals</b>           |                  |                    |                |                    |                    |                |
| <b>Socioeconomic status</b>     |                  |                    |                |                    |                    |                |
| Q1                              | 2%               | 22%                | 19% (10%-28%)* | 1%                 | 48%                | 47% (38%-56%)* |
| Q2                              | 2%               | 22%                | 19% (11%-27%)* | 3%                 | 43%                | 40% (30%-51%)* |
| Q3                              | 6%               | 22%                | 16% (8%-25%)*  | 2%                 | 41%                | 39% (30%-48%)* |
| Q4                              | 5%               | 29%                | 23% (14%-33%)* | 6%                 | 43%                | 38% (28%-48%)* |
| Q5                              | 10%              | 15%                | 6% (-5%-16%)   | 5%                 | 40%                | 34% (23%-45%)* |
| Concentration index (95% CI)    | 0.28 (0.10-0.46) | -0.01 (-0.11-0.08) |                | -0.22 (-0.40-0.04) | -0.04 (-0.09-0.00) |                |
| <b>Gender</b>                   |                  |                    |                |                    |                    |                |

|                                                                  |                   |                   |                     |                   |                  |                     |
|------------------------------------------------------------------|-------------------|-------------------|---------------------|-------------------|------------------|---------------------|
| Male                                                             | 4%                | 24%               | 20% (14%-27%)*      | 2%                | 40%              | 38% (31%-44%)*      |
| Female                                                           | 6%                | 20%               | 14% (9%-19%)*       | 5%                | 48%              | 43% (36%-50%)*      |
| <b>Ethnicity</b>                                                 |                   |                   |                     |                   |                  |                     |
| Scheduled caste                                                  | 6%                | 20%               | 14% (5%-23%)        | 5%                | 40%              | 35% (27%-44%)*      |
| Scheduled tribe                                                  | 3%                | 24%               | 21% (13%-28%)*      | -                 | -                | -                   |
| Other backward caste                                             | 4%                | 23%               | 19% (13%-25%)*      | 2%                | 48%              | 46% (40%-52%)*      |
| Other                                                            | 11%               | 17%               | 6% (-5%-19%)        | 5%                | 39%              | 34% (23%-45%)*      |
| <b>Maternal education</b>                                        |                   |                   |                     |                   |                  |                     |
| Mothers with <1 yr of schooling                                  | 5%                | 21%               | 16% (9%-22%)*       | 2%                | 45%              | 43% (37%-50%)*      |
| Mothers with ≥1 yr of schooling                                  | 4%                | 23%               | 19% (13%-24%)*      | 6%                | 42%              | 36% (29%-42%)*      |
| <b>Antibiotics</b>                                               |                   |                   |                     |                   |                  |                     |
| <b>Socioeconomic status</b>                                      |                   |                   |                     |                   |                  |                     |
| Q1                                                               | 11%               | 34%               | 23% (13%-34%)*      | 19%               | 24%              | 5% (-5%-14%)        |
| Q2                                                               | 16%               | 20%               | 4% (-6%-15%)        | 23%               | 33%              | 9% (-1%-20%)**      |
| Q3                                                               | 20%               | 39%               | 19% (7%-31%)*       | 32%               | 27%              | -5% (-18%-7%)       |
| Q4                                                               | 17%               | 35%               | 18% (7%-29%)*       | 34%               | 23%              | -10% (-23%-3%)      |
| Q5                                                               | 14%               | 31%               | 17% (3%-31%)*       | 40%               | 34%              | -6% (-22%-9%)       |
| Concentration index (95% CI)                                     | 0.09 (-0.02-0.20) | 0.02 (-0.05-0.10) |                     | 0.06 (-0.00-0.12) | 0.07 (0.01-0.12) |                     |
| <b>Gender</b>                                                    |                   |                   |                     |                   |                  |                     |
| Male                                                             | 16%               | 30%               | 14% (7%-21%)*       | 28%               | 29%              | 1% (-6%-8%)         |
| Female                                                           | 16%               | 35%               | 19% (12%-26%)*      | 30%               | 27%              | -4% (-12%-5%)       |
| <b>Ethnicity</b>                                                 |                   |                   |                     |                   |                  |                     |
| Scheduled caste                                                  | 16%               | 43%               | 26% (13%-40%)*      | 28%               | 29%              | 0% (-9%-10%)        |
| Scheduled tribe                                                  | 16%               | 32%               | 16% (7%-25%)*       | -                 | -                | -                   |
| Other backward caste                                             | 12%               | 26%               | 14% (6%-22%)*       | 30%               | 28%              | -2% (-11%-6%)       |
| Other                                                            | 26%               | 38%               | 12% (-7%-32%)       | 28%               | 27%              | -1% (-15%-13%)      |
| <b>Maternal education</b>                                        |                   |                   |                     |                   |                  |                     |
| Mothers with <1 yr of schooling                                  | 14%               | 35%               | 21% (14%-29%)*      | 24%               | 26%              | 2% (-4%-9%)         |
| Mothers with ≥1 yr of schooling                                  | 18%               | 30%               | 12% (5%-19%)*       | 35%               | 30%              | -5% (-14%-4%)       |
| <b>Other treatment: Unknown powder, tablets, syrup, IV fluid</b> |                   |                   |                     |                   |                  |                     |
| <b>Socioeconomic status</b>                                      |                   |                   |                     |                   |                  |                     |
| Q1                                                               | 53%               | 17%               | -36% (-48% - -25%)* | 70%               | 45%              | -25% (-39% - -12%)* |
| Q2                                                               | 52%               | 23%               | -29% (-41% - -17%)* | 77%               | 34%              | -44% (-56% - -32%)* |

|                                 |                   |                    |                    |                    |                   |                    |
|---------------------------------|-------------------|--------------------|--------------------|--------------------|-------------------|--------------------|
| Q3                              | 55%               | 12%                | -44% (-55%- -32%)* | 64%                | 39%               | -25% (-37%- -13%)* |
| Q4                              | 45%               | 10%                | -35% (-46%- -23%)* | 60%                | 44%               | -16% (-29%- -2%)*  |
| Q5                              | 53%               | 12%                | -41% (-56%- -25%)* | 52%                | 42%               | -10% (-26%-6%)     |
| Concentration index (95% CI)    | 0.05 (0.01-0.08)  | -0.01 (-0.06-0.04) |                    | -0.01 (-0.04-0.02) | 0.00 (-0.04-0.05) |                    |
| <b>Gender</b>                   |                   |                    |                    |                    |                   |                    |
| Male                            | 51%               | 13%                | -37% (-45%- -30%)* | 66%                | 43%               | -22% (-32%- -13%)* |
| Female                          | 52%               | 16%                | -36% (-43%- -28%)* | 65%                | 37%               | -28% (-37%- -19%)* |
| <b>Ethnicity</b>                |                   |                    |                    |                    |                   |                    |
| Scheduled caste                 | 57%               | 16%                | -41% (-55%- -26%)* | 63%                | 41%               | -22% (-34%- -10%)* |
| Scheduled tribe                 | 48%               | 15%                | -34% (-45%- -23%)* | -                  | -                 | -                  |
| Other backward caste            | 52%               | 14%                | -38% (-46%- -30%)* | 67%                | 40%               | -27% (-37%- -17%)* |
| Other                           | 49%               | 16%                | -33% (-50%- -16%)* | 65%                | 41%               | -24% (-38%- -9%)*  |
| <b>Maternal education</b>       |                   |                    |                    |                    |                   |                    |
| Mothers with <1 yr of schooling | 56%               | 11%                | -45% (-52%- -38%)* | 71%                | 44%               | -27% (-36%- -19%)* |
| Mothers with ≥1 yr of schooling | 46%               | 17%                | -29% (-37%- -21%)* | 58%                | 37%               | -22% (-31%- -12%)* |
| <b>Home fluids</b>              |                   |                    |                    |                    |                   |                    |
| <b>Socioeconomic status</b>     |                   |                    |                    |                    |                   |                    |
| Q1                              | 24%               | 29%                | 5% (-8%-18%)       | 38%                | 35%               | -4% (-19%-11%)     |
| Q2                              | 20%               | 28%                | 8% (-4%-20%)       | 36%                | 29%               | -7% (-20%-6%)      |
| Q3                              | 16%               | 28%                | 12% (1%-23%)       | 38%                | 27%               | -11% (-24%-2%)*    |
| Q4                              | 21%               | 37%                | 16% (4%-28%)       | 35%                | 33%               | -2% (-16%-11%)     |
| Q5                              | 30%               | 48%                | 18% (2%-34%)       | 40%                | 30%               | -10% (-26%-7%)     |
| Concentration index (95% CI)    | 0.03 (-0.08-0.14) | 0.10 (0.01- 0.19)  |                    | 0.04 (-0.02-0.10)  | 0.06 (0.00-0.11)  |                    |
| <b>Gender</b>                   |                   |                    |                    |                    |                   |                    |
| Male                            | 22%               | 32%                | 11% (3%-19%)       | 36%                | 29%               | -7% (-17%-3%)      |
| Female                          | 23%               | 32%                | 9% (1%-18%)        | 39%                | 32%               | -7% (-16%-3%)      |
| <b>Ethnicity</b>                |                   |                    |                    |                    |                   |                    |
| Scheduled caste                 | 18%               | 31%                | 13% (1%-26%)       | 37%                | 26%               | -10% (-22%-1%)*    |

|                                 |     |     |              |     |     |                |
|---------------------------------|-----|-----|--------------|-----|-----|----------------|
| Scheduled tribe                 | 22% | 34% | 12% (2%-21%) | -   | -   | -              |
| Other backward caste            | 25% | 33% | 8% (-2%-18%) | 37% | 31% | -6% (-17%-5%)  |
| Other                           | 19% | 27% | 8% (-8%-24%) | 41% | 40% | -1% (-17%-14%) |
| <b>Maternal education</b>       |     |     |              |     |     |                |
| Mothers with <1 yr of schooling | 20% | 36% | 16% (8%-24%) | 35% | 27% | -8% (-17%-2%)  |
| Mothers with ≥1 yr of schooling | 25% | 30% | 5% (-3%-13%) | 41% | 35% | -6% (-16%-5%)  |
